# Supplementary material for: Plastome Analysis and Phylogenetic Reconstruction of Iris Speci es in China
Source: Research Square preprint supplement (doi:10.21203/rs.3.rs-7909828/v1), 2025-12-04
Supplement: Supplementary file 1 [file 6c2c03751e5ccca3ca6d02a4.docx]

| **Table S3** The indexes of the codon usage dias in *Iris* plastomes | | | | | | | | |
| --- | --- | --- | --- | --- | --- | --- | --- | --- |
| **Species** | | **CDS Length** | **Codon No.** | **GC2s** | **GC3s** | | **CBI** | **ENC** |
| *Iris afghanica* | | 82770 | 27590 | 0.3782 | 0.279 | | -0.111 | 50.22 |
| *Iris atrofusca* | | 83034 | 27678 | 0.3783 | 0.279 | | -0.112 | 50.23 |
| *Iris atropurpurea* | | 83097 | 27699 | 0.3777 | 0.279 | | -0.111 | 50.17 |
| *Iris austrotschatkalica* | | 82221 | 27407 | 0.3780 | 0.280 | | -0.109 | 50.37 |
| *Iris barbatula* | | 85530 | 28510 | 0.3778 | 0.280 | | -0.109 | 50.28 |
| *Iris bismarckiana* | | 82908 | 27636 | 0.3780 | 0.278 | | -0.112 | 50.15 |
| *Iris bloudowii* | | 82830 | 27610 | 0.3761 | 0.278 | | -0.112 | 50.09 |
| *Iris bostrensis* | | 83715 | 27905 | 0.3777 | 0.281 | | -0.112 | 50.35 |
| *Iris bulleyana* | | 84333 | 28111 | 0.3780 | 0.285 | | -0.106 | 50.70 |
| *Iris cangshanensis* | | 82122 | 27374 | 0.3714 | 0.275 | | -0.11 | 49.98 |
| *Iris cedreti* | | 83589 | 27863 | 0.3777 | 0.280 | | -0.111 | 50.30 |
| *Iris chrysographes* | | 87933 | 29311 | 0.3779 | 0.288 | | -0.105 | 50.96 |
| *Iris collettii* | | 83460 | 27820 | 0.3786 | 0.279 | | -0.11 | 50.21 |
| *Iris confusa* | | 85176 | 28392 | 0.3794 | 0.282 | | -0.108 | 50.53 |
| *Iris cuniculiformis* | | 83361 | 27787 | 0.3778 | 0.279 | | -0.112 | 50.24 |
| *Iris decora* | | 85146 | 28382 | 0.3783 | 0.281 | | -0.109 | 50.31 |
| *Iris delavayi* | | 85266 | 28422 | 0.3784 | 0.285 | | -0.106 | 50.67 |
| *Iris dichotoma* | | 85665 | 28555 | 0.3772 | 0.280 | | -0.109 | 50.31 |
| *Iris domestica* | | 83472 | 27824 | 0.3777 | 0.280 | | -0.109 | 50.30 |
| *Iris domestica* (*Belamcanda chinensis*) | | 83478 | 27826 | 0.3777 | 0.280 | | -0.109 | 50.30 |
| *Iris ensata* | | 86904 | 28968 | 0.3795 | 0.285 | | -0.11 | 50.79 |
| *Iris flavissima* | | 84768 | 28256 | 0.3765 | 0.279 | | -0.113 | 50.23 |
| *Iris gateii* | | 84036 | 28012 | 0.3798 | 0.287 | | -0.119 | 50.85 |
| *Iris germanica* | | 84915 | 28305 | 0.3789 | 0.280 | | -0.112 | 50.29 |
| *Iris goniocarpa* | | 81447 | 27149 | 0.3774 | 0.277 | | -0.111 | 50.04 |
| *Iris goniocarpa var. tenella* | | 81831 | 27277 | 0.3772 | 0.278 | | -0.111 | 50.11 |
| *Iris halophila* | | 83922 | 27974 | 0.3790 | 0.286 | | -0.111 | 50.80 |
| *Iris haynei* | | 82911 | 27637 | 0.3775 | 0.278 | | -0.113 | 50.17 |
| *Iris hermona* | | 82128 | 27376 | 0.3772 | 0.278 | | -0.112 | 50.10 |
| *Iris hippolyti* | | 84342 | 28114 | 0.3768 | 0.285 | | -0.108 | 50.68 |
| *Iris iberica* | | 83064 | 27688 | 0.3779 | 0.280 | | -0.111 | 50.29 |
| *Iris imbricata* | | 83910 | 27970 | 0.3775 | 0.277 | | -0.112 | 50.07 |
| *Iris japonica* | | 84246 | 28082 | 0.3781 | 0.281 | | -0.109 | 50.40 |
| *Iris koreana* | | 82182 | 27394 | 0.3756 | 0.281 | | -0.111 | 50.42 |
| *Iris lactea* | | 84219 | 28073 | 0.3792 | 0.286 | | -0.111 | 50.80 |
| *Iris lactea var. lactea* | | 85173 | 28073 | 0.3784 | 0.287 | | -0.111 | 50.82 |
| *Iris laevigata* | | 85962 | 28654 | 0.3798 | 0.284 | | -0.11 | 50.63 |
| *Iris latistyla* | | 85743 | 28581 | 0.3783 | 0.279 | | -0.107 | 50.23 |
| *Iris leptophylla* | | 83640 | 27880 | 0.3784 | 0.278 | | -0.11 | 50.07 |
| *Iris loczyi* | | 84069 | 28023 | 0.3798 | 0.287 | | -0.109 | 50.91 |
| *Iris lortetii* | 82974 | 27658 | 0.3779 | 0.279 | -0.111 | | 50.26 |
| **Table S3** Continued | | | | | | | | |
| **Species** | | **CDS Length** | **Codon No.** | **GC2s** | **GC3s** | | **CBI** | **ENC** |
| *Iris luojiensis* | 84630 | 28210 | 0.3791 | 0.289 | -0.106 | | 50.85 |
| *Iris lutescens* | 82113 | 27371 | 0.3782 | 0.276 | -0.113 | | 50.01 |
| *Iris lycotis* | 83853 | 27951 | 0.3779 | 0.280 | -0.112 | | 50.32 |
| *Iris mandshurica* | 84768 | 28256 | 0.3765 | 0.279 | -0.113 | | 50.23 |
| *Iris mariae* | 83742 | 27914 | 0.3784 | 0.280 | -0.112 | | 50.34 |
| *Iris melisii* | 82779 | 27593 | 0.3792 | 0.282 | -0.107 | | 50.38 |
| *Iris minutoaurea* | 81723 | 27241 | 0.3757 | 0.281 | -0.111 | | 50.40 |
| *Iris missouriensis* | 82131 | 27377 | 0.3794 | 0.280 | -0.106 | | 50.23 |
| *Iris nigricans* | 82974 | 27658 | 0.3781 | 0.279 | -0.113 | | 50.20 |
| *Iris odaesanensis* | 85080 | 28360 | 0.3780 | 0.282 | -0.108 | | 50.51 |
| *Iris orchioides* | 83214 | 27738 | 0.3782 | 0.281 | -0.11 | | 50.38 |
| *Iris paradoxa* | 83754 | 27918 | 0.3781 | 0.281 | -0.111 | | 50.38 |
| *Iris parvula* | 83940 | 27980 | 0.3767 | 0.282 | -0.111 | | 50.48 |
| *Iris petrana* | 82506 | 27502 | 0.3780 | 0.278 | -0.113 | | 50.18 |
| *Iris pseudacorus* | 83502 | 27834 | 0.3796 | 0.282 | -0.11 | | 50.47 |
| *Iris pseudocapnoides* | 83454 | 27818 | 0.3783 | 0.282 | -0.109 | | 50.50 |
| *Iris pumila* | 82872 | 27624 | 0.3785 | 0.277 | -0.112 | | 50.10 |
| *Iris reticulata* | 85395 | 28465 | 0.3772 | 0.279 | -0.114 | | 50.20 |
| *Iris rossii* | 83823 | 27941 | 0.3776 | 0.281 | -0.111 | | 50.33 |
| *Iris rossii var. latifolia* | 82560 | 27520 | 0.3772 | 0.279 | -0.109 | | 50.21 |
| *Iris ruthenica* | 84741 | 28247 | 0.3792 | 0.288 | -0.105 | | 50.89 |
| *Iris sanguinea* | 85824 | 28608 | 0.3777 | 0.287 | -0.107 | | 50.84 |
| *Iris scariosa* | 88215 | 29405 | 0.3766 | 0.283 | -0.106 | | 50.61 |
| *Iris setosa* | 86118 | 28706 | 0.3764 | 0.283 | -0.11 | | 50.52 |
| *Iris sofarana* | 82956 | 27652 | 0.3778 | 0.280 | -0.111 | | 50.29 |
| *Iris speculatrix* | 82524 | 27508 | 0.3803 | 0.281 | -0.111 | | 50.31 |
| *Iris sprengeri* | 82989 | 27663 | 0.3779 | 0.279 | -0.112 | | 50.18 |
| *Iris tectorum* | 83085 | 27695 | 0.3785 | 0.281 | -0.107 | | 50.39 |
| *Iris tectorum f. alba* | 82818 | 27606 | 0.3777 | 0.281 | -0.107 | | 50.38 |
| *Iris tenuifolia* | 82296 | 27432 | 0.3788 | 0.283 | -0.11 | | 50.63 |
| *Iris tigridia* | 83697 | 27899 | 0.3769 | 0.279 | -0.112 | | 50.23 |
| *Iris tigridia var. tigridia* | 82812 | 27604 | 0.3782 | 0.278 | -0.112 | | 50.07 |
| *Iris typhifolia* | 85368 | 28456 | 0.3770 | 0.286 | -0.109 | | 50.72 |
| *Iris uniflora* | 84489 | 28163 | 0.3786 | 0.286 | -0.107 | | 50.76 |
| *Iris ventricosa* | 84087 | 28029 | 0.3789 | 0.287 | -0.114 | | 50.95 |
| *Iris victoris* | 84771 | 28257 | 0.3769 | 0.283 | -0.109 | | 50.65 |
| *Iris wattii* | 83196 | 27732 | 0.3770 | 0.280 | -0.113 | | 50.30 |
| *Iris wilsonii* | 83604 | 27868 | 0.3787 | 0.284 | -0.107 | | 50.59 |
