# Supplementary material for: Plastome Analysis and Phylogenetic Reconstruction of Iris Speci es in China
Source: Research Square preprint supplement (doi:10.21203/rs.3.rs-7909828/v1), 2025-12-04
Supplement: Supplementary file 2 [file 6e0481a0daa73e162a01f029.docx]

| **Table S6** Number of simple sequence repeats (SSRs) in *Iris* plastomes | | | | | | | |
| --- | --- | --- | --- | --- | --- | --- | --- |
| **Species** | **Six SSR types** | | | | | | |
| **Mono-** | **Di-** | **Tri-** | **Tetra-** | **Penta-** | **Hexa-** | **Total** |
| *Iris afghanica* | 28 | 12 | 3 | 5 | 2 | 0 | 50 |
| *Iris atrofusca* | 31 | 11 | 3 | 4 | 1 | 0 | 50 |
| *Iris atropurpurea* | 34 | 9 | 2 | 4 | 1 | 0 | 50 |
| *Iris austrotschatkalica* | 26 | 8 | 1 | 3 | 0 | 0 | 38 |
| *Iris barbatula* | 29 | 13 | 4 | 5 | 2 | 1 | 54 |
| *Iris bismarckiana* | 37 | 15 | 3 | 6 | 3 | 1 | 65 |
| *Iris bloudowii* | 25 | 7 | 2 | 2 | 0 | 0 | 36 |
| *Iris bostrensis* | 27 | 9 | 3 | 3 | 1 | 0 | 43 |
| *Iris bulleyana* | 32 | 11 | 3 | 4 | 2 | 0 | 52 |
| *Iris cangshanensis* | 40 | 14 | 4 | 7 | 3 | 1 | 69 |
| *Iris cedreti* | 29 | 9 | 2 | 4 | 1 | 0 | 45 |
| *Iris chrysographes* | 33 | 10 | 3 | 5 | 2 | 0 | 53 |
| *Iris collettii* | 30 | 12 | 3 | 5 | 1 | 0 | 51 |
| *Iris confusa* | 25 | 8 | 2 | 3 | 0 | 0 | 38 |
| *Iris cuniculiformis* | 30 | 12 | 4 | 6 | 3 | 1 | 56 |
| *Iris decora* | 31 | 13 | 4 | 6 | 2 | 1 | 57 |
| *Iris delavayi* | 34 | 10 | 3 | 5 | 1 | 0 | 53 |
| *Iris dichotoma* | 35 | 13 | 3 | 4 | 2 | 1 | 58 |
| *Iris domestica* | 38 | 16 | 5 | 7 | 3 | 1 | 70 |
| *Iris domestica* (*Belamcanda chinensis*) | 33 | 4 | 2 | 0 | 0 | 0 | 39 |
| *Iris ensata* | 27 | 9 | 2 | 3 | 1 | 0 | 42 |
| *Iris flavissima* | 26 | 11 | 3 | 4 | 1 | 0 | 45 |
| *Iris gatesii* | 32 | 1 | 2 | 0 | 0 | 0 | 35 |
| *Iris germanica* | 39 | 17 | 4 | 8 | 4 | 2 | 74 |
| *Iris goniocarpa* | 28 | 10 | 3 | 5 | 2 | 0 | 48 |
| *Iris goniocarpa var. tenella* | 26 | 9 | 2 | 4 | 1 | 0 | 42 |
| *Iris halophila* | 22 | 6 | 1 | 2 | 0 | 0 | 31 |
| *Iris haynei* | 29 | 8 | 3 | 3 | 1 | 0 | 44 |
| *Iris hermona* | 32 | 14 | 4 | 5 | 3 | 1 | 59 |
| *Iris hippolyti* | 33 | 12 | 3 | 6 | 2 | 0 | 56 |
| *Iris iberica* | 35 | 15 | 4 | 7 | 3 | 1 | 65 |
| *Iris imbricata* | 30 | 10 | 3 | 5 | 2 | 0 | 50 |
| *Iris japonica* | 22 | 10 | 4 | 4 | 4 | 1 | 45 |
| *Iris koreana* | 28 | 9 | 2 | 3 | 1 | 0 | 43 |
| *Iris lactea* | 24 | 14 | 3 | 5 | 4 | 0 | 50 |
| *Iris lactea var. lactea* | 23 | 13 | 3 | 5 | 3 | 0 | 47 |
| *Iris laevigata* | 36 | 16 | 5 | 8 | 4 | 2 | 71 |
| *Iris latistyla* | 44 | 10 | 3 | 5 | 3 | 0 | 65 |
| *Iris leptophylla* | 29 | 10 | 3 | 5 | 2 | 0 | 49 |
| **Table S6** Continued | | | | | | | |
| **Species** | **Six SSR types** | | | | | | |
| **Mono-** | **Di-** | **Tri-** | **Tetra-** | **Penta-** | **Hexa-** | **Total** |
| *Iris loczyi* | 20 | 9 | 1 | 7 | 4 | 0 | 41 |
| *Iris lortetii* | 33 | 9 | 2 | 4 | 1 | 0 | 49 |
| *Iris luojiensis* | 25 | 9 | 2 | 7 | 2 | 1 | 46 |
| *Iris lutescens* | 45 | 9 | 3 | 4 | 1 | 0 | 62 |
| *Iris lycotis* | 31 | 9 | 2 | 4 | 1 | 0 | 47 |
| *Iris mandshurica* | 26 | 11 | 3 | 4 | 1 | 0 | 45 |
| *Iris mariae* | 33 | 9 | 2 | 4 | 1 | 0 | 49 |
| *Iris milesii* | 37 | 13 | 4 | 4 | 2 | 0 | 60 |
| *Iris minutoaurea* | 27 | 15 | 5 | 9 | 2 | 0 | 58 |
| *Iris missouriensis* | 33 | 11 | 2 | 6 | 1 | 1 | 54 |
| *Iris nigricans* | 33 | 9 | 2 | 4 | 1 | 0 | 49 |
| *Iris odaesanensis* | 25 | 10 | 3 | 5 | 1 | 2 | 46 |
| *Iris orchioides* | 30 | 8 | 4 | 5 | 1 | 1 | 49 |
| *Iris paradoxa* | 30 | 9 | 2 | 4 | 1 | 0 | 46 |
| *Iris parvula* | 32 | 8 | 3 | 5 | 1 | 1 | 50 |
| *Iris petrana* | 34 | 9 | 2 | 4 | 1 | 0 | 50 |
| *Iris pseudacorus* | 34 | 20 | 2 | 7 | 1 | 0 | 64 |
| *Iris pseudocapnoides* | 28 | 10 | 4 | 5 | 1 | 1 | 49 |
| *Iris pumila* | 46 | 9 | 3 | 4 | 1 | 0 | 63 |
| *Iris reticulata* | 34 | 20 | 2 | 7 | 1 | 0 | 64 |
| *Iris rossii* | 17 | 11 | 3 | 7 | 2 | 1 | 41 |
| *Iris rossii var. latifolia* | 16 | 13 | 3 | 7 | 2 | 1 | 42 |
| *Iris ruthenica* | 16 | 13 | 3 | 7 | 1 | 0 | 40 |
| *Iris sanguinea* | 36 | 14 | 2 | 7 | 1 | 0 | 60 |
| *Iris scariosa* | 29 | 16 | 5 | 7 | 3 | 0 | 60 |
| *Iris setosa* | 35 | 21 | 2 | 8 | 1 | 0 | 67 |
| *Iris sofarana* | 31 | 9 | 2 | 4 | 1 | 0 | 47 |
| *Iris speculatrix* | 37 | 10 | 3 | 6 | 1 | 1 | 58 |
| *Iris sprengeri* | 31 | 9 | 2 | 4 | 1 | 0 | 47 |
| *Iris tectorum* | 38 | 11 | 4 | 3 | 3 | 0 | 59 |
| *Iris tectorum f. alba* | 38 | 11 | 4 | 3 | 3 | 0 | 59 |
| *Iris tenuifolia* | 18 | 12 | 4 | 5 | 1 | 1 | 41 |
| *Iris tigridia* | 26 | 12 | 3 | 4 | 1 | 0 | 46 |
| *Iris tigridia var. tigridia* | 41 | 10 | 4 | 6 | 0 | 0 | 61 |
| *Iris typhifolia* | 35 | 15 | 2 | 7 | 1 | 0 | 60 |
| *Iris uniflora* | 18 | 13 | 3 | 7 | 1 | 0 | 42 |
| *Iris ventricosa* | 20 | 9 | 6 | 9 | 0 | 0 | 44 |
| *Iris victoris* | 27 | 7 | 3 | 5 | 1 | 1 | 44 |
| *Iris wattii* | 25 | 10 | 2 | 6 | 4 | 0 | 47 |
| *Iris wilsonii* | 30 | 15 | 3 | 8 | 1 | 0 | 57 |
