# Supplementary material for: Plastome Analysis and Phylogenetic Reconstruction of Iris Speci es in China
Source: Research Square preprint supplement (doi:10.21203/rs.3.rs-7909828/v1), 2025-12-04
Supplement: Supplementary file 3 [file 775f39420f6d50b1e177db5e.docx]

Table S1. Collecting sites, distribution area and accession number of the plastome data used in this study.

| **species** | **Collected site** | **Distribution area** | **Voucher number** | **NCBI ID** |
| --- | --- | --- | --- | --- |
| ***Crocus cartwrightianus*** | NCBI | Greece | \ | NC 041459 |
| ***Crocus sativus*** | NCBI | Greece | \ | NC 041460 |
| ***Iris barbatula*** | Shangri-la county, Yunnan province | Northwest Yunnan province | DLYW0001 | PX406250 |
| ***Iris bulleyana*** | Shangri-la county, Yunnan province | Yunnan, Sichuan, Xizang | DLYW0002 | PX406251 |
| ***Iris cangshanensis*** | Yangbi county, Yunnan province | Yunnan province | KKZW1130 | PP766875 |
| ***Iris chrysographes*** | Cultivated in Dali city, Yunnan province | Sichuan, Yunnan, Guizhou, Xizang | DLYW0003 | PX406252 |
| ***Iris collettii*** | Chuxiong city, Yunnan province | Yunnan, Sichuan, Xizang | DLYW0004 | PX208733 |
| ***Iris decora*** | Dali city, Yunnan province | Yunnan, Sichuan, Xizang, Nepal | KKZW1153 | PX240972 |
| ***Iris delavayi*** | Dali city, Yunnan province | Yunnan, Sichuan, Xizang | KKZW1152 | PX406253 |
| ***Iris latistyla*** | Ludian county, Yunnan province | Yunnan, Xizang | DLYW0005 | PX406254 |
| ***Iris leptophylla*** | Cultivated in Dali city, Yunnan province | Sichuan, Gansu | DLYW0006 | PP799047 |
| ***Iris milesii*** | Heqing county, Yunnan province | Yunnan, Sichuan, Xizang | DLYW0007 | PX406255 |
| ***Iris pumila*** | Cultivated in Dali city, Yunnan province | Central Europe to Caucasus | DLYW0008 | PX171330 |
| ***Iris reticulata*** | Cultivated in Dali city, Yunnan province | Türkiye to Iran and Turkmenist | DLYW0009 | PX406256 |
| ***Iris scariosa*** | Yili city, Xinjiang | Caucasus to Xinjiang | DLYW0010 | PX406257 |
| ***Iris tectorum f. alba*** | Cultivated in Dali city, Yunnan province | Zhejiang | DLYW0011 | PX406258 |
| ***Iris tenuifolia*** | Jinzhong city, Shanxi province | North and west China to Afghanistan and Turkey | DLYW0012 | PX406259 |
| ***Iris ventricosa*** | Biyang county, Henan province | North China to Mongolia and Russia | DLYW0013 | PX406260 |
| ***Iris wattii*** | Fugong county, Yunnan province | Yunnan, Xizang | DLYW0014 | PX171329 |
| ***Iris afghanica*** | NCBI | Afghanistan | \ | NC 081929 |
| ***Iris atrofusca*** | NCBI | Syria to Israel | \ | NC 063915 |
| ***Iris atropurpurea*** | NCBI | Israel | \ | MW476736 |
| ***Iris austrotschatkalica*** | NCBI | Uzbekistan | \ | NC 068838 |
| ***Iris bismarckiana*** | NCBI | Lebanon to Israel and Jordan | \ | NC 081930 |
| ***Iris bloudowii*** | NCBI | Xinjiang, Mongolia and Siberia | \ | NC 086581 |
| ***Iris bostrensis*** | NCBI | Syria to Jordan | \ | NC 085776 |
| ***Iris cedreti*** | NCBI | Lebanon | \ | NC 063917 |
| ***Iris confusa*** | NCBI | Yunnan, Sichuan, Guangxi, Guizhou | \ | PP916053 |
| ***Iris cuniculiformis*** | NCBI | Yunnan, Sichuan, Xizang | \ | OP925758 |
| ***Iris dichotoma*** | NCBI | North China, Mongolia and Russia | \ | OK448492 |
| ***Iris domestica*** | NCBI | India, China, Japan and Russia | \ | MK593156 |
| \ | OK448491 |
| ***Iris ensata*** | NCBI | East China, Korea and Japan | \ | MN535046 |
| ***Iris flavissima*** | NCBI | North China, Mongolia, Russia | \ | NC 086580 |
| ***Iris gatesii*** | NCBI | Turkey to Iraq | \ | NC 024936 |
| ***Iris germanica*** | NCBI | Europe | \ | NC 062594 |
| ***Iris goniocarpa*** | NCBI | West China | \ | OP925757 |
| ***Iris goniocarpa var.tenella*** | NCBI | Qinghai | \ | OP925760 |
| ***Iris halophila*** | NCBI | Northwest China | \ | OP348949 |
| ***Iris haynei*** | NCBI | Israel | \ | NC 063918 |
| ***Iris hermona*** | NCBI | Syria to Lebanon | \ | NC 081931 |
| ***Iris hippolyti*** | NCBI | Central Asia | \ | OK138594 |
| ***Iris iberica*** | NCBI | Turkey to Iran | \ | NC 085774 |
| ***Iris imbricata*** | NCBI | Caucasus to Iran | \ | NC 085779 |
| ***Iris japonica*** | NCBI | China, Japan | \ | NC 060499 |
| ***Iris koreana*** | NCBI | Korea | \ | NC 056174 |
| ***Iris lactea*** | NCBI | North China | \ | NC 056175 |
| ***Iris lactea var.lactea*** | NCBI | North China | \ | MT740331 |
| ***Iris laevigata*** | NCBI | China, Korea, Japan and Russia | \ | NC 056176 |
| ***Iris loczyi*** | NCBI | North and West China, Russia | \ | MT254070 |
| ***Iris lortetii*** | NCBI | Lebanon to Central Syria | \ | NC 081932 |
| ***Iris luojiensis*** | NCBI | Sichuan | \ | PP734290 |
| ***Iris lutescens*** | NCBI | SW. Europe to Italy | \ | NC 085775 |
| ***Iris lycotis*** | NCBI | Turkey to Iran | \ | OR742346 |
| ***Iris mandshurica*** | NCBI | Northeast China, Korea, Russia | \ | OP925759 |
| ***Iris mariae*** | NCBI | Israel to Sinai | \ | NC 063921 |
| ***Iris minutoaurea*** | NCBI | Northeast China, Japan | \ | NC 056177 |
| ***Iris missouriensis*** | NCBI | W. Canada to Central U.S.A | \ | NC 042827 |
| ***Iris nigricans*** | NCBI | Jordan | \ | NC 063922 |
| ***Iris odaesanensis*** | NCBI | NE. China to Korea | \ | NC 056178 |
| ***Iris orchioides*** | NCBI | Central Asia | \ | NC 088562 |
| ***Iris paradoxa*** | NCBI | Turkey to Iran | \ | NC 085783 |
| ***Iris parvula*** | NCBI | Central Asia | \ | PQ218628 |
| ***Iris petrana*** | NCBI | Jordan | \ | MW476743 |
| ***Iris pseudacorus*** | NCBI | Europe to Caucasus | \ | NC 056179 |
| ***Iris pseudocapnoides*** | NCBI | Central Asia | \ | NC 068839 |
| ***Iris rossii*** | NCBI | NE. China to Korea | \ | MK593166 |
| ***Iris rossii var.latifolia*** | NCBI | NE. China to Korea | \ | OR396998 |
| ***Iris ruthenica*** | NCBI | Xinjiang | \ | OM037824 |
| ***Iris sanguinea*** | NCBI | North China, Mongolia, Russia, Japan | \ | NC 029227 |
| ***Iris setosa*** | NCBI | NE. China, Korea, Russia, Japan | \ | NC 056182 |
| ***Iris sofarana*** | NCBI | Lebanon | \ | NC 085780 |
| ***Iris speculatrix*** | NCBI | Central China | \ | PP734292 |
| ***Iris sprengeri*** | NCBI | Turkey | \ | NC 085778 |
| ***Iris tectorum*** | NCBI | China, Japan | \ | MT103435 |
| ***Iris tigridia*** | NCBI | North China, Mongolia, Russia | \ | OP925763 |
| ***Iris tigridia var. tigridia*** | NCBI | Northeast China | \ | PP734291 |
| ***Iris typhifolia*** | NCBI | North China | \ | OQ128112 |
| ***Iris uniflora*** | NCBI | North China, Korea, Russia | \ | NC 056183 |
| ***Iris victoris*** | NCBI | Uzbekistan | \ | NC 068840 |
| ***Iris wilsonii*** | NCBI | Central China | \ | PP734295 |
