# Supplementary material for: Plastome Analysis and Phylogenetic Reconstruction of Iris Speci es in China
Source: Research Square preprint supplement (doi:10.21203/rs.3.rs-7909828/v1), 2025-12-04
Supplement: Supplementary file 4 [file 9d836a2d3f7d6af95707ed89.docx]

**
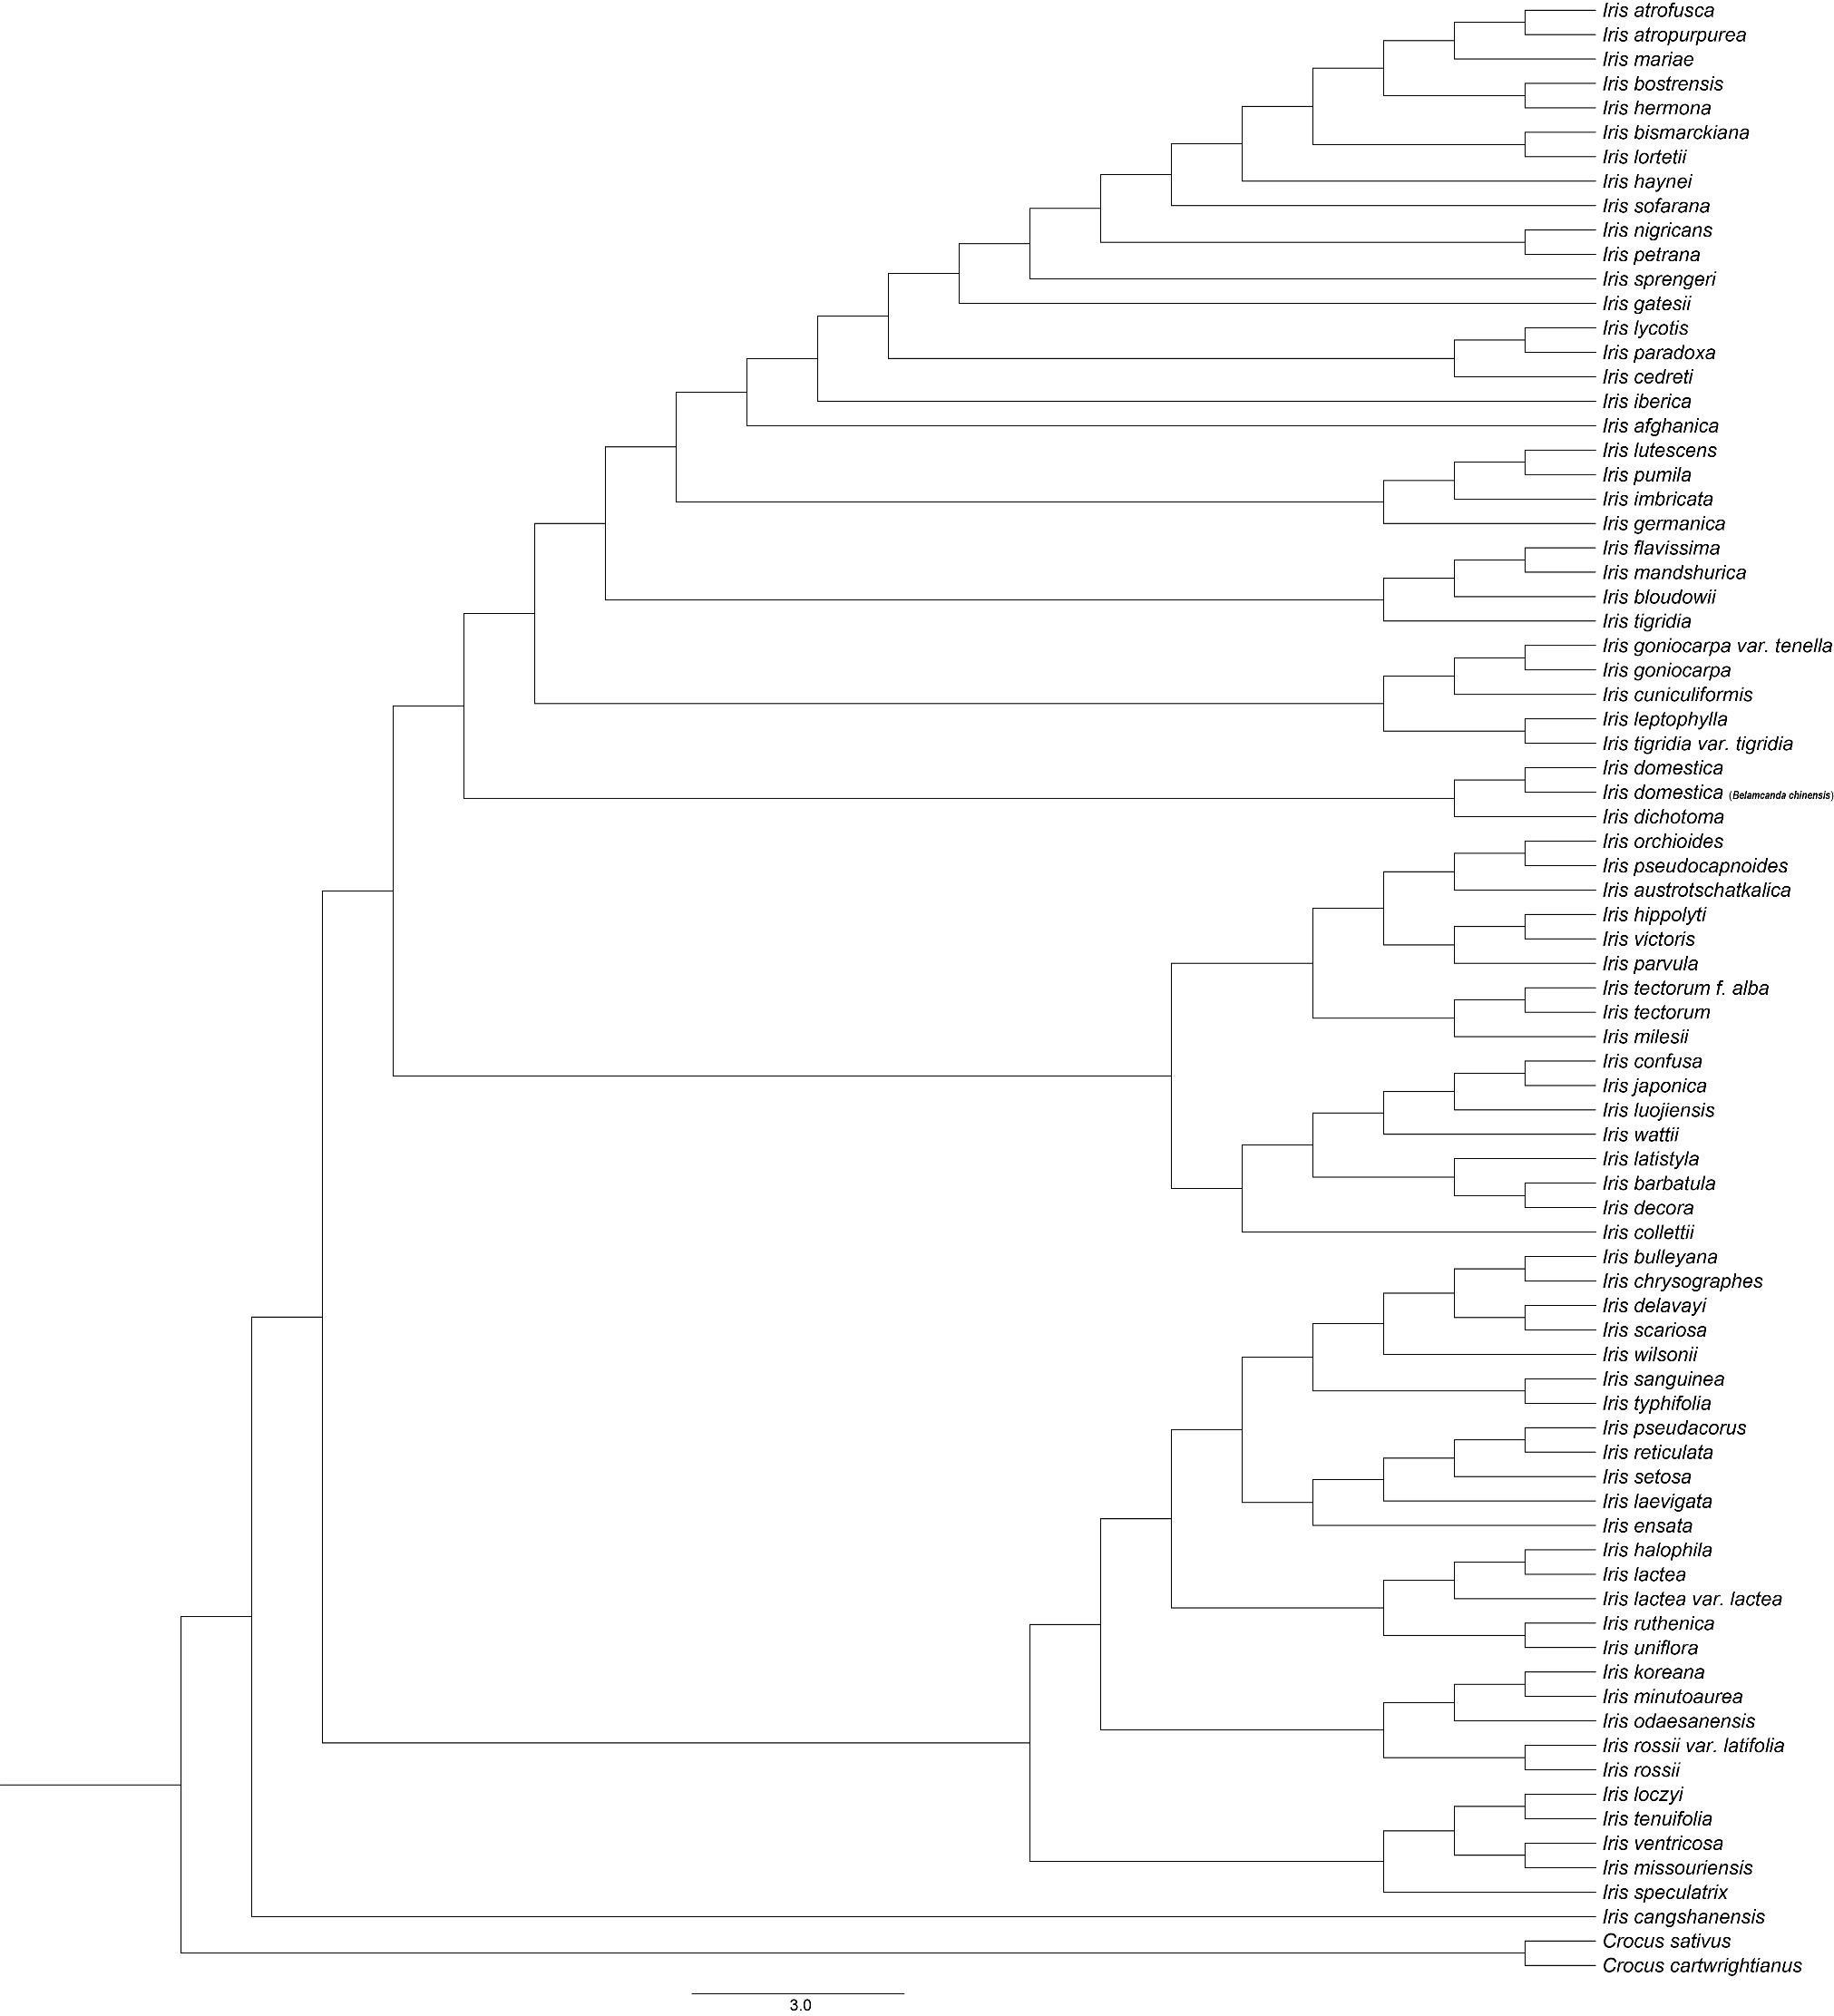
**

**Figure S1** Phylogenetic tree of *Iris* inferred from complete plastomes based on maximum likelihood (ML)

**
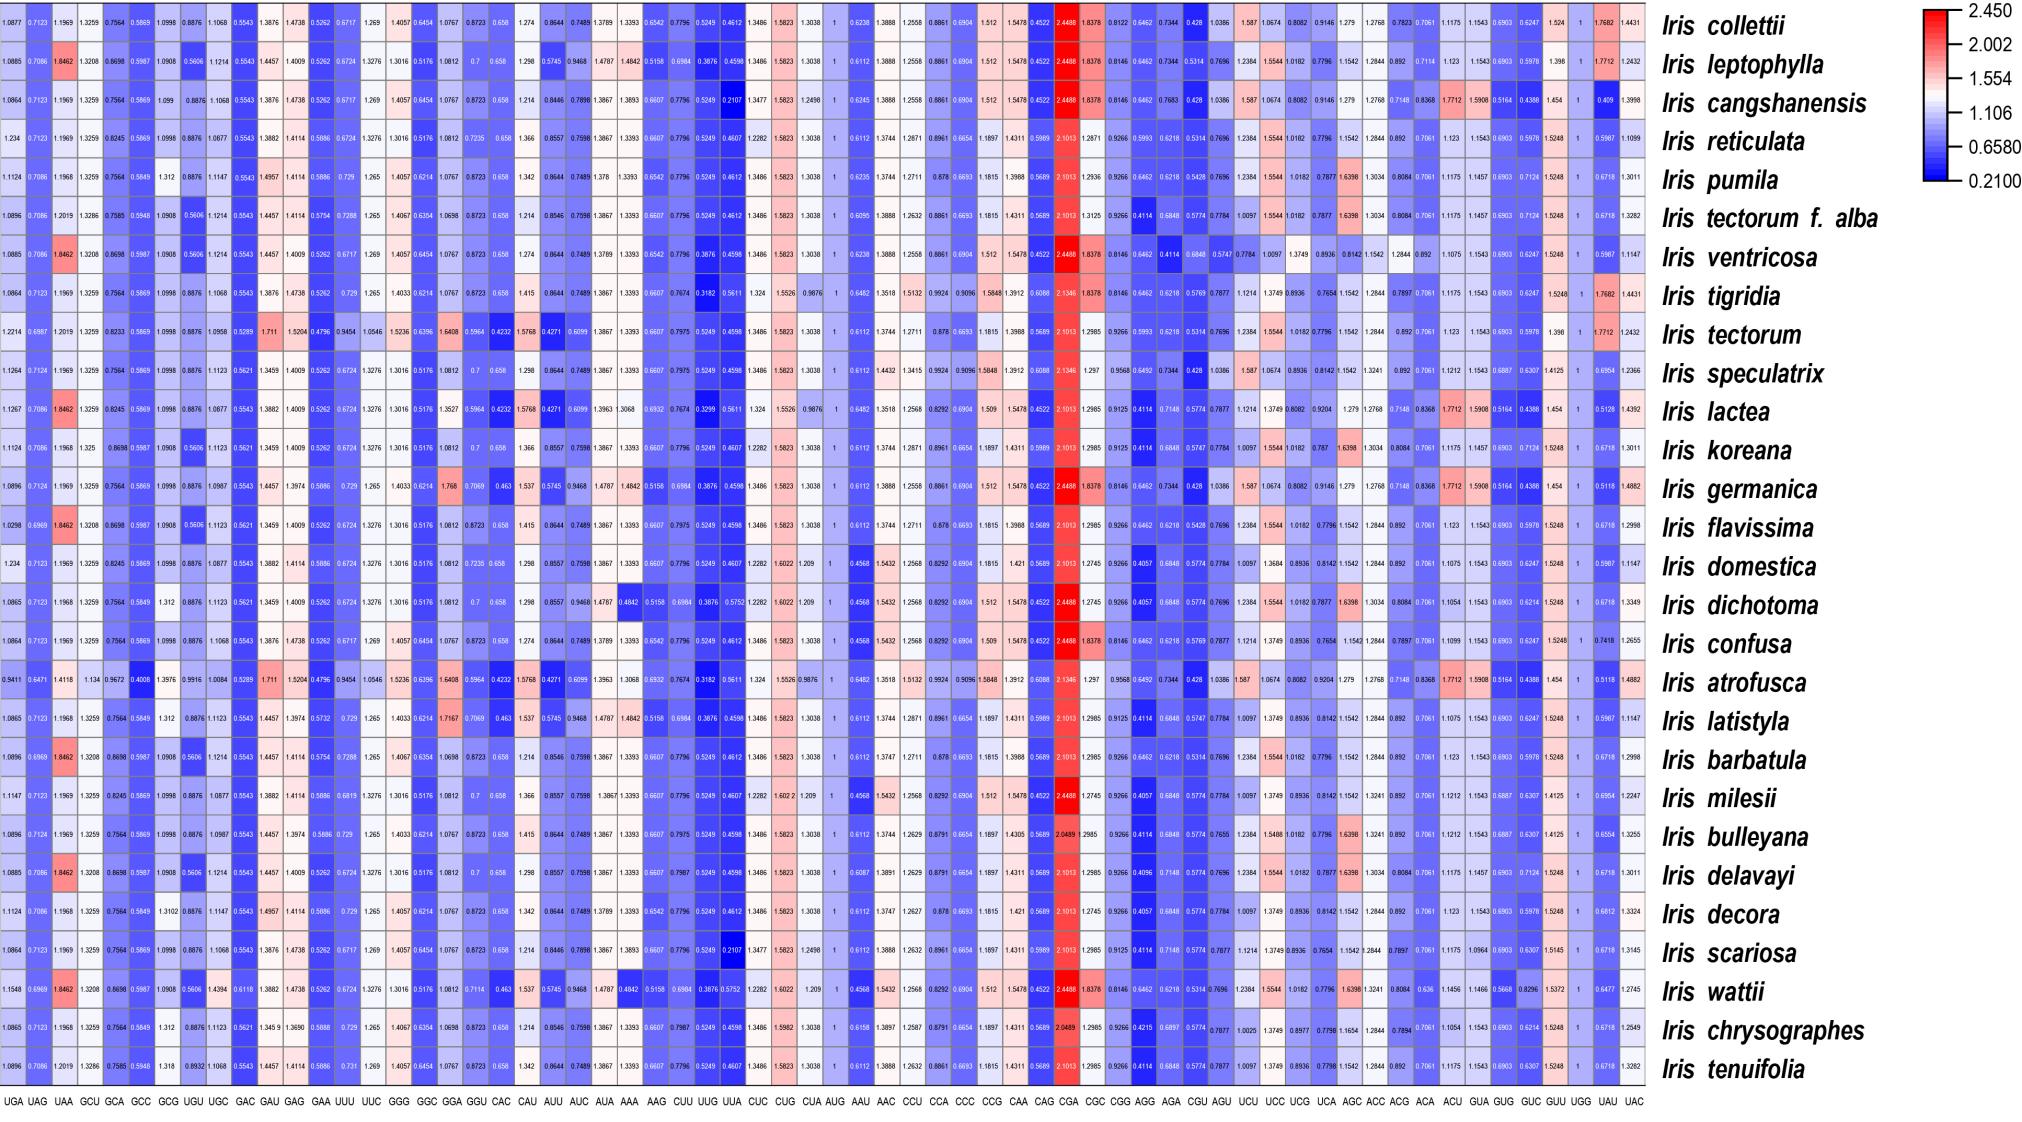
**

**Figure S2** Heat map of codon usage for 28 *Iris* species

**
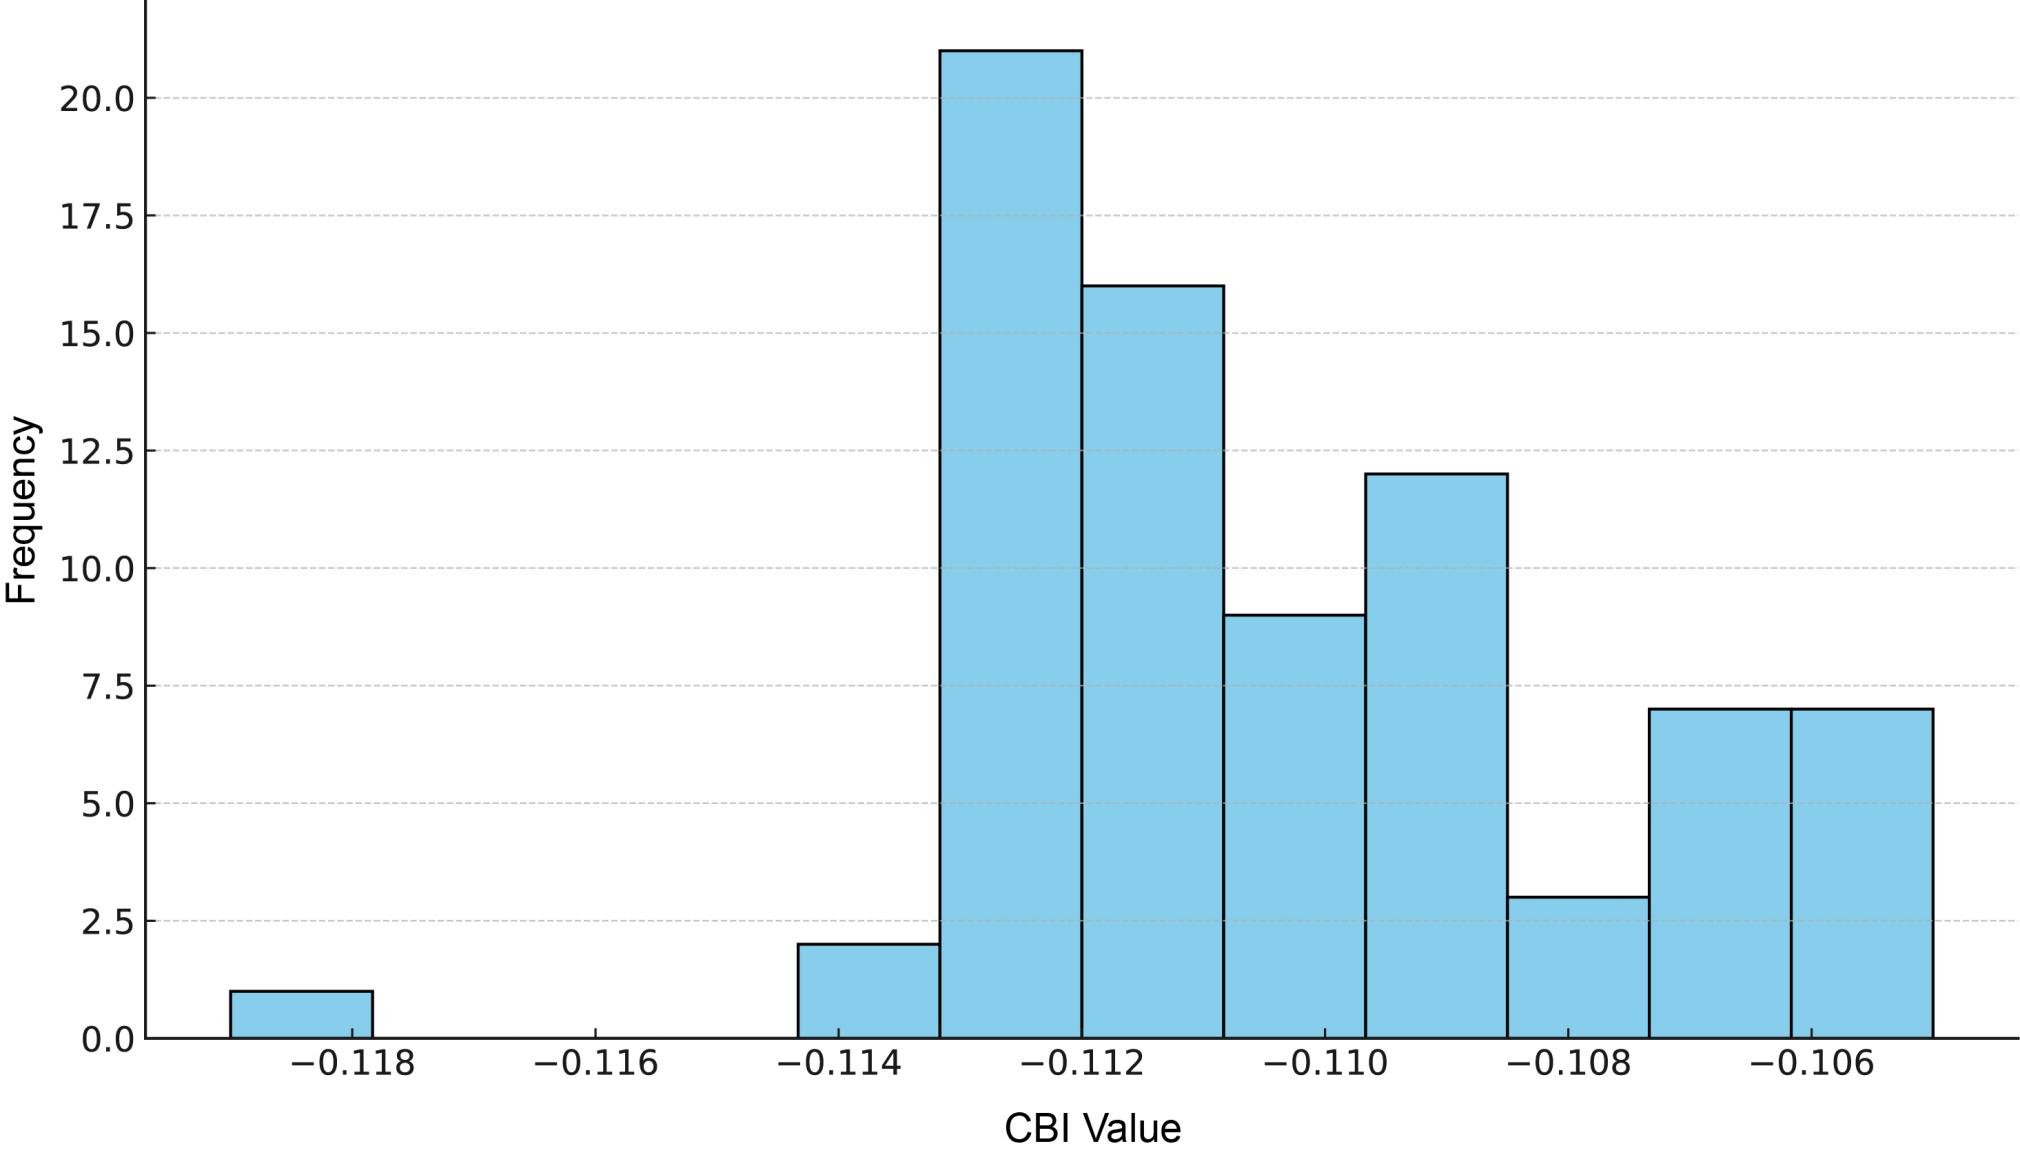
**

**Figure S3** Distribution of codon bias index (CBI) values

**
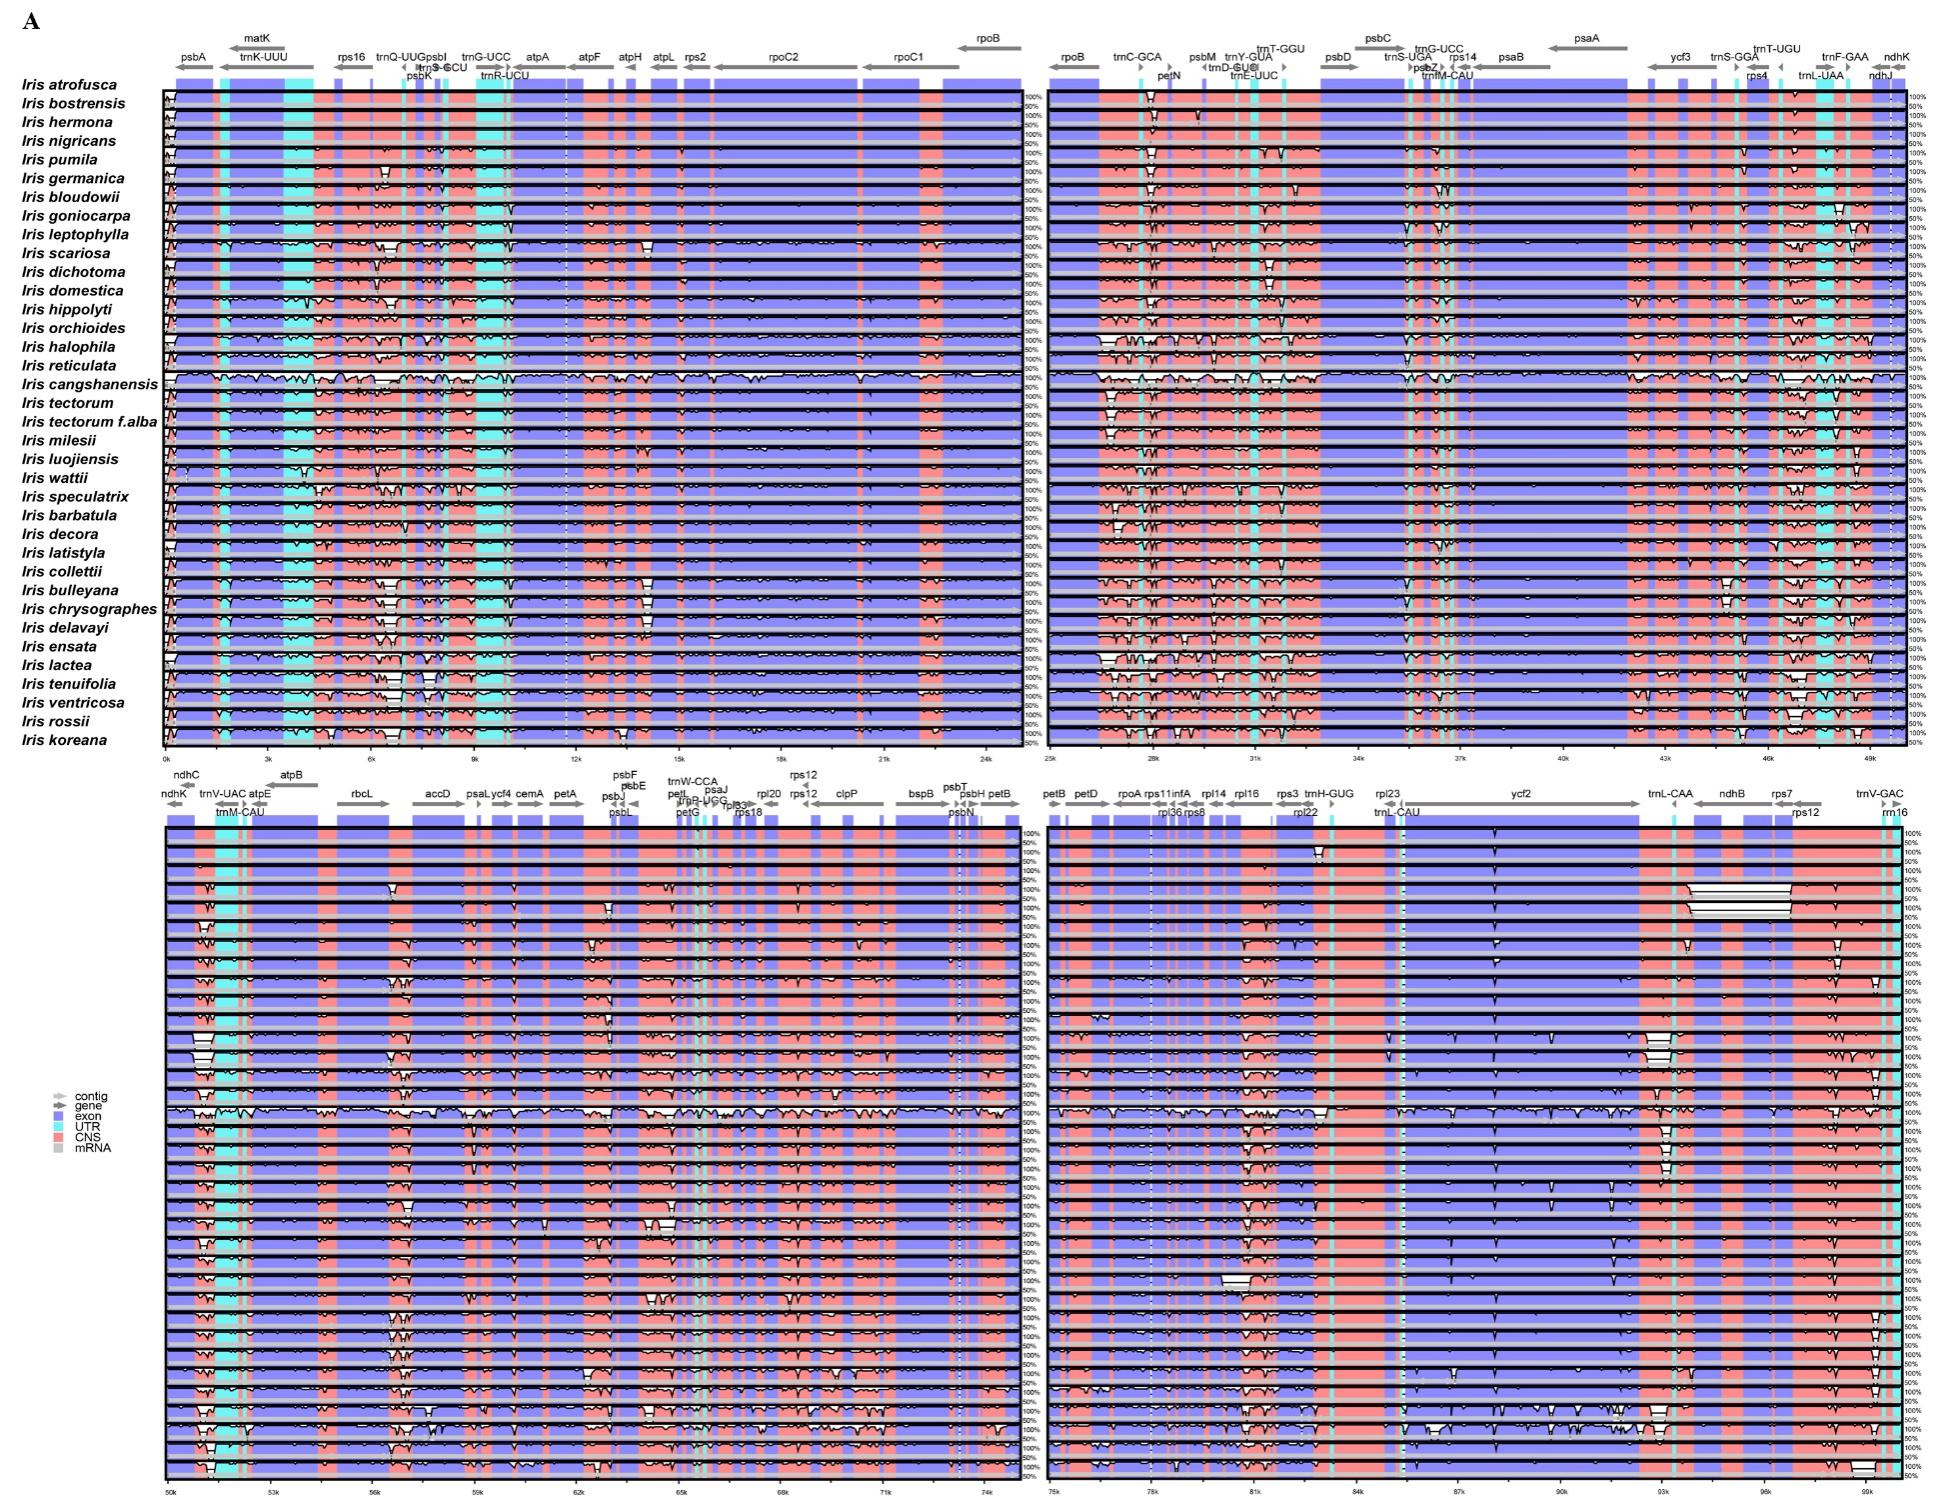
**

**
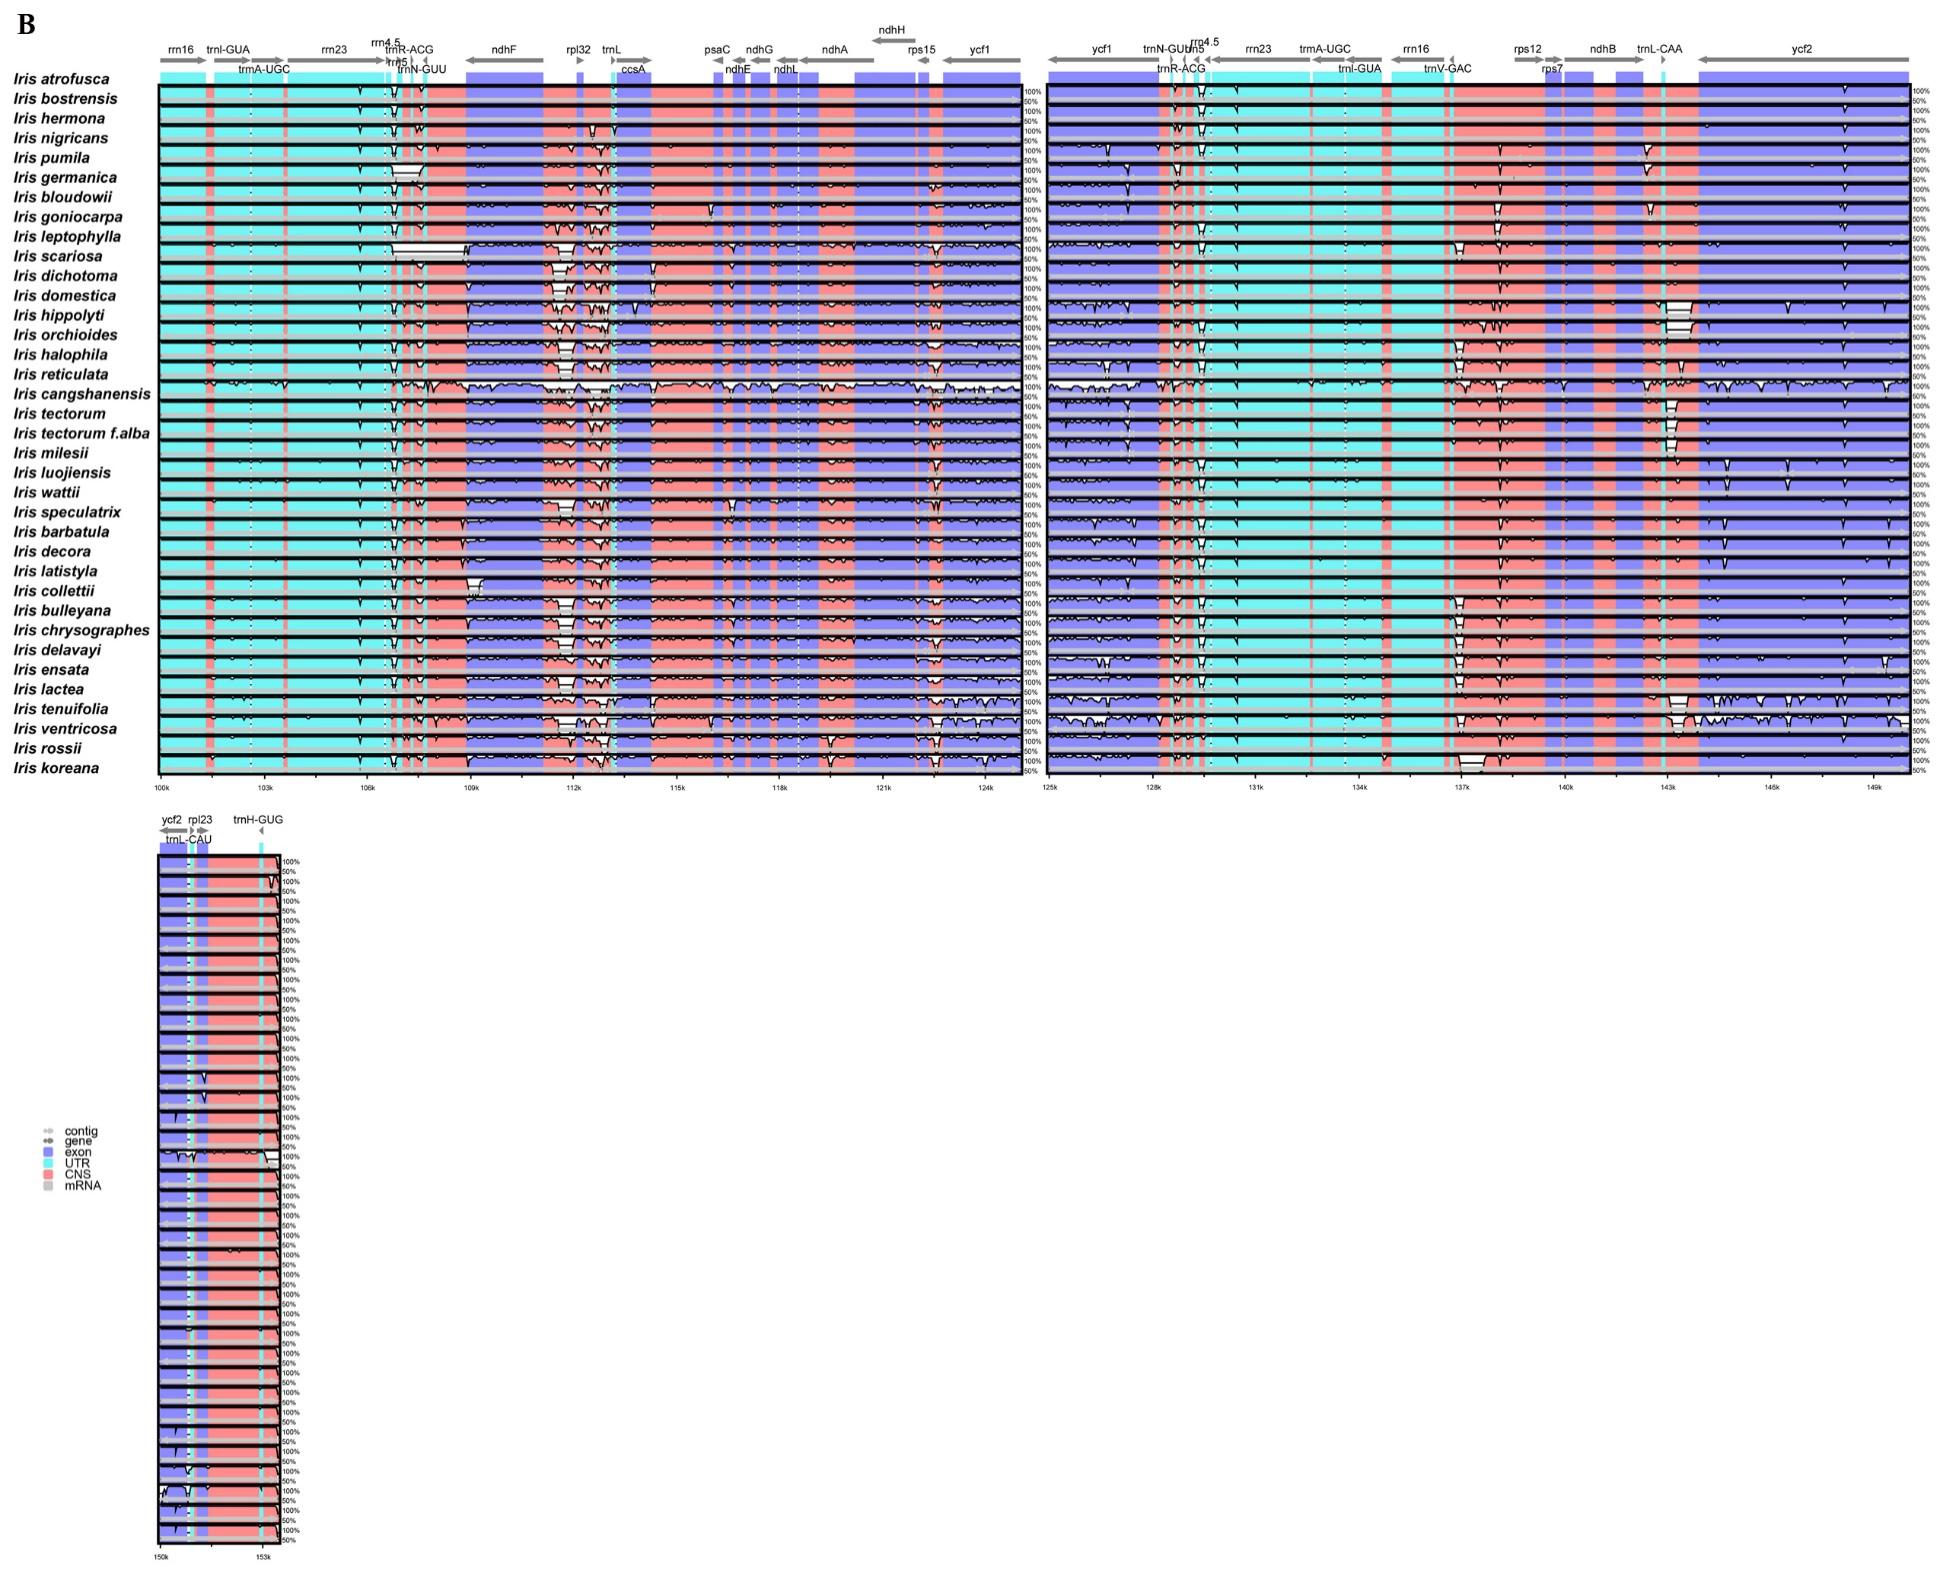
**

**Figure S4** Sequence alignment of 36 plastome of *Iris* species using mVISTA and chloroplast genome of *Iris germanica* (NC_062594) as reference. The top arrow shows transcription direction, blue color indicates protein-coding regions, pink color shows non-coding sequences and light green indicates tRNAs and rRNAs. The x-axis represents the coordinates in the cp genome while y-axis represents percentage identity within 50–100%


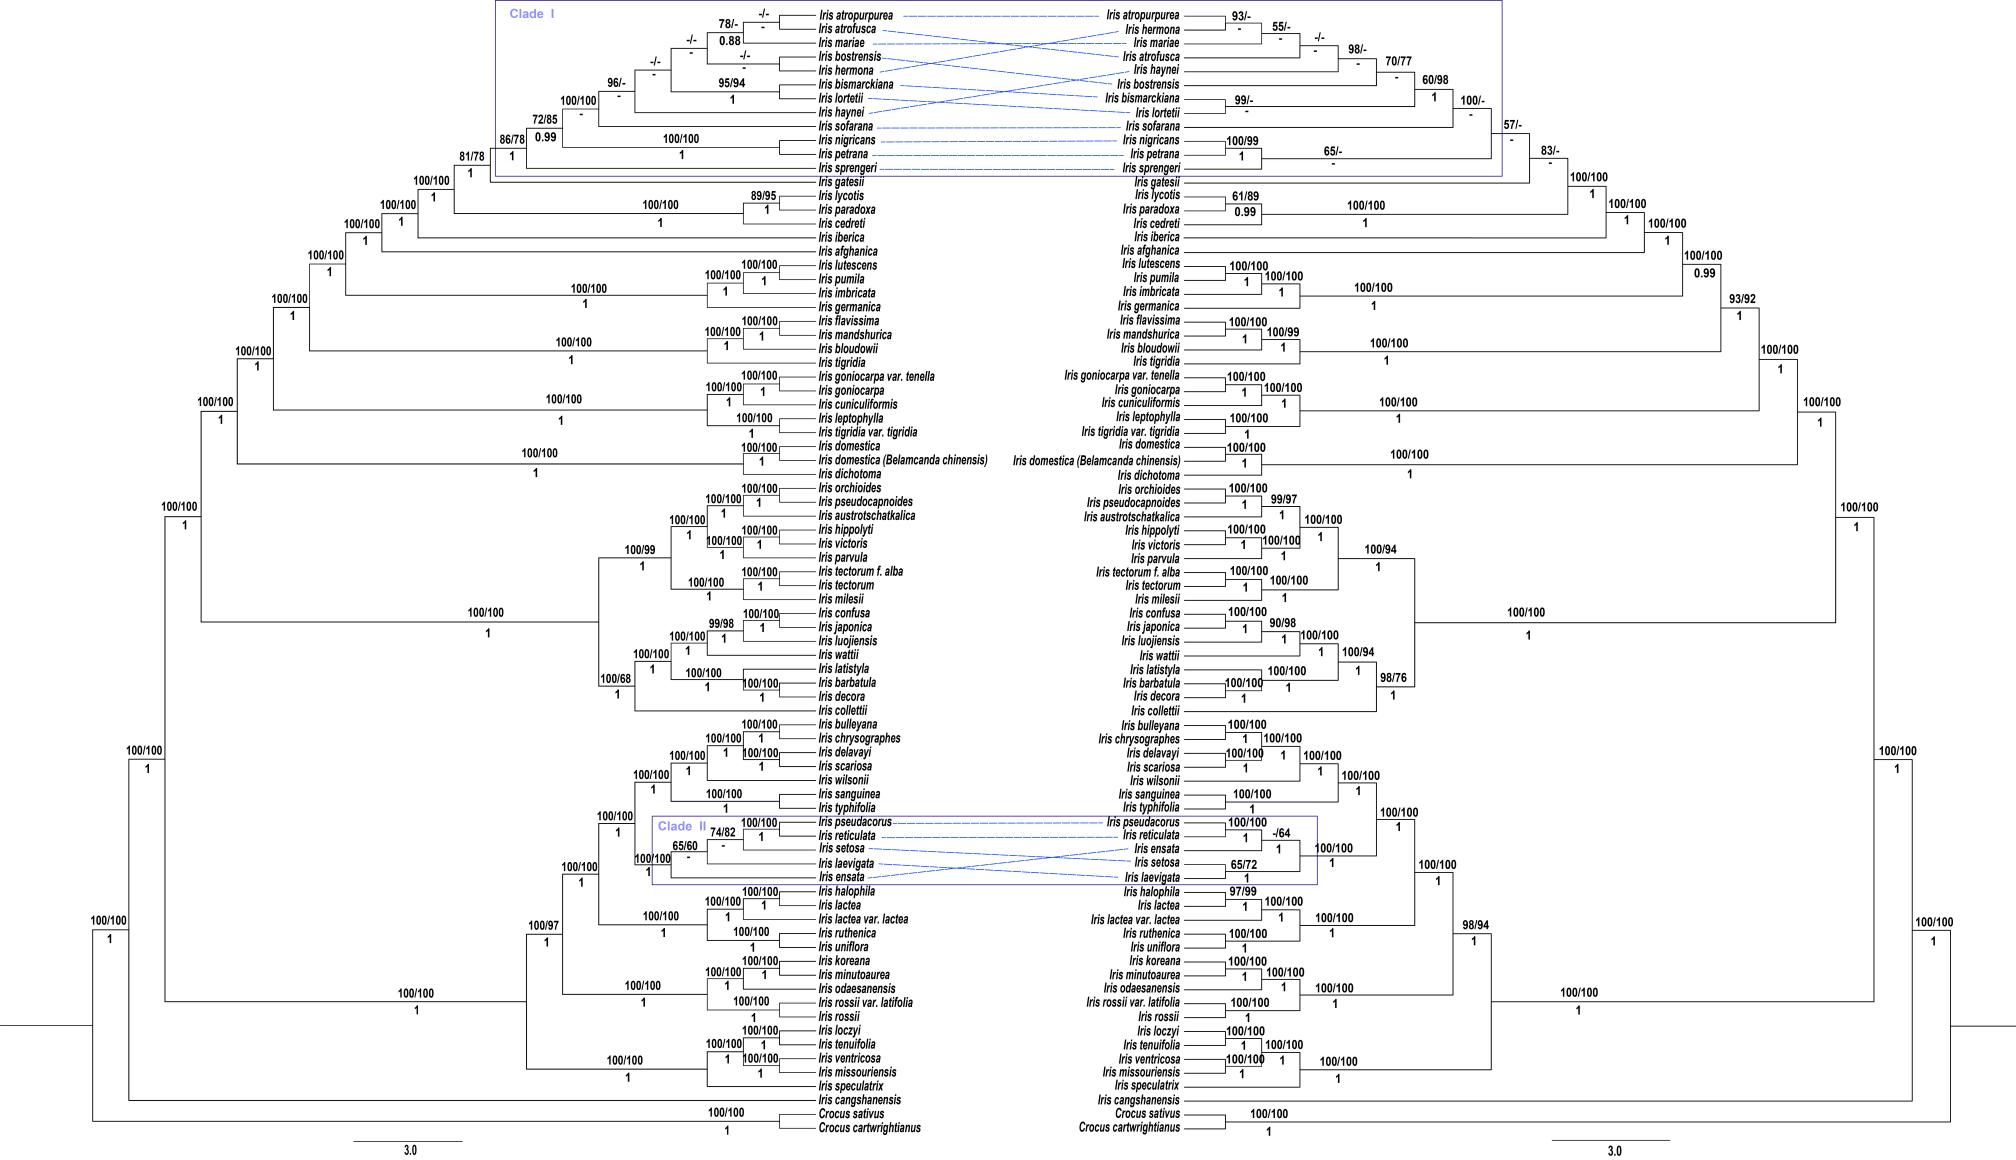


**Figure S5** Topological comparison between the phylogenies inferred from (**A**) complete plastomes dataset and (**B**) CDSs dataset. ML/MP Bootstrap (BS) values and BI posterior probabilities (PP) are shown at nodes
