# Supplementary material for: Plastome Analysis and Phylogenetic Reconstruction of Iris Speci es in China
Source: Research Square preprint supplement (doi:10.21203/rs.3.rs-7909828/v1), 2025-12-04
Supplement: Supplementary file 5 [file bb4fd2bd22df68e6dbc9b218.docx]

| **Table S4** Codon usage of 28 *Iris* species | | | | | | | | |
| --- | --- | --- | --- | --- | --- | --- | --- | --- |
| **Codon** | **Aa** | **RSCU** | **Codon** | **Aa** | **RSCU** | **Codon** | **Aa** | **RSCU** |
| UGA | Stop | 0.9411-1.234 | AUU | Ile | 0.4271-0.8644 | CGC | Arg | 1.2745-1.8378 |
| UAG | 0.6471-0.7142 | AUC | 0.6099-0.9468 | CGG | 0.8122-0.9568 |
| UAA | 1.1968-1.8462 | AUA | 1.3789-1.4787 | AGG | 0.4057-0.6492 |
| GCU | Ala | 1.1340-1.3286 | AAA | Lys | 0.4842-1.4842 | AGA | 0.4114-0.7683 |
| GCA | 0.7564-0.9672 | AAG | 0.5158-0.6932 | CGU | 0.4280-0.6848 |
| GCC | 0.4008-0.5987 | CUU | Leu | 0.6984-0.7987 | AGU | Ser | 0.5747-1.0386 |
| GCG | 1.0908-1.3976 | UUG | 0.3182-0.5249 | UCU | 0.7784-1.5870 |
| UGU | Cys | 0.5606-0.9916 | UUA | 0.2107-0.5752 | UCC | 1.0097-1.5544 |
| UGC | 1.0084-1.4394 | CUC | 1.2282-1.3486 | UCG | 0.8082-1.3749 |
| GAC | Asp | 0.5289-0.6118 | CUG | 1.5526-1.6022 | UCA | 0.7654-0.9204 |
| GAU | 1.3459-1.7110 | CUA | 0.9876-1.3038 | AGC | 0.8142-1.6398 |
| GAG | Glu | 1.3690-1.5204 | AUG | Met | 1 | ACC | Thr | 1.1542-1.3241 |
| GAA | 0.4796-0.5888 | AAU | Asn | 0.4568-0.6482 | ACG | 0.7148-1.2844 |
| UUU | Phe | 0.6717-0.9454 | AAC | 1.3518-1.5432 | ACA | 0.6360-0.8920 |
| UUC | 1.0546-1.3276 | CCU | Pro | 1.2558-1.5132 | ACU | 1.1054-1.7712 |
| GGG | Gly | 1.3016-1.5236 | CCA | 0.8292-0.9924 | GUA | Val | 1.0964-1.5908 |
| GGC | 0.5176-0.6454 | CCC | 0.6654-0.9096 | GUG | 0.5164-0.6903 |
| GGA | 1.0698-1.7680 | CCG | 1.1815-1.5848 | GUC | 0.4388-0.8296 |
| GGU | 0.5964-0.8723 | CAA | Glu | 1.3912-1.5478 | GUU | 1.3980-1.5372 |
| CAC | His | 0.4232-0.6580 | CAG | 0.4522-0.6088 | UGG | Trp | 1 |
| CAU | 1.2140-1.5768 | CGA | Arg | 2.0489-2.4488 | UAU | Tyr | 0.4090-1.7712 |
|  |  |  |  |  |  | UAC | 1.1099-1.4882 |
