# Supplementary material for: Plastome Analysis and Phylogenetic Reconstruction of Iris Speci es in China
Source: Research Square preprint supplement (doi:10.21203/rs.3.rs-7909828/v1), 2025-12-04
Supplement: Supplementary file 6 [file d788732abba382f37c4ccc3c.docx]

| **Table S2** List of genes present in the plastomes of *Iris* species generated in this study | | |  |
| --- | --- | --- | --- |
| **Categoryfor gene** | **Group of genes** | **Name of genes** | **Amount** |
| Self-replication | Large subunit of ribosome | *rpl20,rpl22,rpl32,rpl23*(**X2**)*,rpl14,rpl33,rpl16*,rpl36,rpl2** (**X2**)*,* | 11(10-12) |
|  | Small subunit of ribosome | *rps11,rps14,rps15,rps16*,rps2,rps3,rps18,rps4,rps19*(**X2**)*,rps7*(**X2**)*,rps8,rps12***(**X2**)*,* | 15(13-16) |
|  | DNA dependent RNA polymerase | *rpoA,rpoB,rpoC1*,rpoC2,* | 4 |
|  | rRNA gene | *rrn5*(**X2**)*,rrn4.5*(**X2**)*,rrn16*(**X2**)*,rrn23*(**X2**)*,* | 8(0) |
|  | tRNA gene | *trnR-UCU,trnE-UUC,trnT-GGU,trnS-GGA,trnI-CAU*(**X2**)*,trnV-GAC*(**X2**)*,trnR-ACG*(**X2**)*,trnL-UAA*,*  *trnD-GUC,trnY-GUA,trnP-UGG,trnM-CAU,trnL-CAA*(**X2**)*,trnS-GCU,trnW-CCA,trnF-GAA,trnT-UGU,*  *trnS-UGA,trnV-UAC*,trnG-UCC*(**X2**)*,trnL-UAG,trnI-GAU**(**X2**)*,trnH-GUG*(**X2**)*,trnfM-CAU,trnQ-UUG,*  *trnN-GUU*(**X2**)*,trnK-UUU*,trnA-UGC**(**X2**)*,trnC-GCA,* | 38(29-41) |
| Photosynthesis | Subunits of photosystem I | *psaA,psaB,psaC,psaI,psaJ,* | 5 |
|  | Subunits of photosystem II | *psbL,psbZ,psbM,psbN,psbA,psbB,psbC,psbD,psbE,psbF,psbT,psbH,psbI,psbJ,psbK,* | 15(14) |
|  | Subunits of NADH-dehydrogenase | *ndhG,ndhH,ndhJ,ndhK,ndhL,ndhA*,ndhB**(**X2**)*,ndhC,ndhD,ndhE,ndhF,* | 12(9) |
|  | Subunits of cytochrome b/f complex | *petL,petN,petA,petB*,petD*,petG,* | 6 |
|  | Subunit for ATP synthase | *atpI,atpA,atpB,atpE,atpF*,atpH,* | 6 |
|  | Large subunit of rubisco | *rbcL,* | 1 |
| Other genes | Translational initiation factor | *infA,* | 1 |
|  | Maturase | *matK,* | 1 |
|  | Protease | *clpP**,* | 1 |
|  | Envelope membrane protein | *cemA,* | 1 |
|  | Subunit of Acetyl-carboxylase | *accD,* | 1 |
|  | C-type cytochrome synthesis gene | *ccsA,* | 1 |
|  | Open reading frames (ORF,ycf) | *ycf1, ycf2*(**X2**)*, ycf3**, ycf4,* | 5 |
| Total |  |  | 132(123-132) |
| **Note:** Genes marked with **X2** indicates two gene copies; one asterisk (*****) contain one intron; two asterisks (******) represent two introns. | | | |
