# Supplementary material for: Plastome Analysis and Phylogenetic Reconstruction of Iris Speci es in China
Source: Research Square preprint supplement (doi:10.21203/rs.3.rs-7909828/v1), 2025-12-04
Supplement: Supplementary file 7 [file de1d4a541f01878ca629af8e.docx]

| **Table S7** The estimation of substitution rate and dN/dS | | | | | | | |
| --- | --- | --- | --- | --- | --- | --- | --- |
| **Genes** | **dN** | **dS** | **dN/dS** | **Genes** | **dN** | **dS** | **dN/dS** |
| ***accD*** | 0.0155 | 0.0536 | 0.2899 | ***psbF*** | 0.0053 | 0.0298 | 0.1784 |
| ***atpA*** | 0.0044 | 0.0594 | 0.0746 | ***psbH*** | 0.0049 | 0.0510 | 0.0964 |
| ***atpB*** | 0.0036 | 0.0574 | 0.0624 | ***psbI*** | 0.0006 | 0.0843 | 0.0076 |
| ***atpE*** | 0.0106 | 0.0560 | 0.1883 | ***psbJ*** | 0.0021 | 0.0301 | 0.0696 |
| ***atpF*** | 0.0144 | 0.0403 | 0.3578 | ***psbK*** | 0.0176 | 0.0354 | 0.4952 |
| ***atpH*** | 0.0002 | 0.0552 | 0.0033 | ***psbL*** | 0.0006 | 0.0211 | 0.0292 |
| ***ccsA*** | 0.0180 | 0.0559 | 0.3228 | ***psbM*** | 0.0010 | 0.0404 | 0.0244 |
| ***cemA*** | 0.0430 | 0.0830 | 0.5187 | ***psbT*** | 0.0000 | 0.0634 | 0.0000 |
| ***infA*** | 0.0198 | 0.0536 | 0.3694 | ***rbcL*** | 0.0042 | 0.0623 | 0.0670 |
| ***matK*** | 0.0252 | 0.0601 | 0.4199 | ***rpl14*** | 0.0076 | 0.0574 | 0.1325 |
| ***ndhA*** | 0.0133 | 0.0765 | 0.1733 | ***rpl16*** | 0.0130 | 0.1037 | 0.1254 |
| ***ndhB*** | 0.0018 | 0.0088 | 0.2038 | ***rpl20*** | 0.0153 | 0.0562 | 0.2728 |
| ***ndhC*** | 0.0064 | 0.0449 | 0.1428 | ***rpl22*** | 0.0116 | 0.1239 | 0.0933 |
| ***ndhE*** | 0.0090 | 0.0744 | 0.1211 | ***rpl23*** | 0.0019 | 0.0062 | 0.3027 |
| ***ndhF*** | 0.0186 | 0.0860 | 0.2169 | ***rpl32*** | 0.0124 | 0.0885 | 0.1397 |
| ***ndhG*** | 0.0121 | 0.0525 | 0.2296 | ***rpl33*** | 0.0136 | 0.0586 | 0.2315 |
| ***ndhH*** | 0.0073 | 0.0782 | 0.0928 | ***rpl36*** | 0.0029 | 0.0521 | 0.0562 |
| ***ndhJ*** | 0.0080 | 0.0493 | 0.1628 | ***rpoA*** | 0.0198 | 0.0667 | 0.2976 |
| ***ndhK*** | 0.0080 | 0.0536 | 0.1494 | ***rpoB*** | 0.0074 | 0.0451 | 0.1653 |
| ***petA*** | 0.0049 | 0.0646 | 0.0751 | ***rpoC1*** | 0.0092 | 0.0589 | 0.1561 |
| ***petB*** | 0.0037 | 0.0592 | 0.0632 | ***rpoC2*** | 0.0163 | 0.0549 | 0.2975 |
| ***petD*** | 0.0410 | 0.1225 | 0.3347 | ***rps2*** | 0.0064 | 0.0579 | 0.1103 |
| ***petG*** | 0.0015 | 0.0265 | 0.0578 | ***rps3*** | 0.0109 | 0.0709 | 0.1534 |
| ***petL*** | 0.0068 | 0.0324 | 0.2085 | ***rps4*** | 0.0066 | 0.0404 | 0.1624 |
| ***petN*** | 0.0008 | 0.0331 | 0.0231 | ***rps7*** | 0.0017 | 0.0144 | 0.1199 |
| ***psaA*** | 0.0010 | 0.0398 | 0.0246 | ***rps8*** | 0.0071 | 0.0913 | 0.0777 |
| ***psaB*** | 0.0016 | 0.0419 | 0.0380 | ***rps11*** | 0.0098 | 0.0858 | 0.1143 |
| ***psaC*** | 0.0003 | 0.0801 | 0.0033 | ***rps12*** | 0.0005 | 0.0164 | 0.0336 |
| ***psaJ*** | 0.0048 | 0.0470 | 0.1020 | ***rps14*** | 0.0033 | 0.0461 | 0.0722 |
| ***psbA*** | 0.0003 | 0.0443 | 0.0079 | ***rps15*** | 0.0275 | 0.0558 | 0.4939 |
| ***psbC*** | 0.0009 | 0.0411 | 0.0216 | ***rps16*** | 0.0091 | 0.0537 | 0.1689 |
| ***psbD*** | 0.0003 | 0.0397 | 0.0081 | ***rps18*** | 0.0096 | 0.0481 | 0.1991 |
| ***psbE*** | 0.0012 | 0.0258 | 0.0457 | ***ycf2*** | 0.0084 | 0.0091 | 0.9215 |
