# Supplementary material for: Plastome Analysis and Phylogenetic Reconstruction of Iris Speci es in China
Source: Research Square preprint supplement (doi:10.21203/rs.3.rs-7909828/v1), 2025-12-04
Supplement: Supplementary file 8 [file e3cc9f676fdab897fc56e3d6.docx]

| **Table S5** Number of short dispersed repeats (SDRs) in *Iris* plastomes | | | | | |
| --- | --- | --- | --- | --- | --- |
| **Species** | **Four SDR types** | | | |  |
| **Reverse repeat** | **Forward repeat** | **Palindromic repeat** | **Complement repeat** | **Total** |
| *Iris afghanica* | 16 | 2 | 19 | 0 | 37 |
| *Iris atrofusca* | 15 | 2 | 18 | 0 | 35 |
| *Iris atropurpurea* | 17 | 2 | 19 | 0 | 38 |
| *Iris austrotschatkalica* | 17 | 2 | 18 | 0 | 37 |
| *Iris barbatula* | 24 | 4 | 31 | 0 | 59 |
| *Iris bismarckiana* | 16 | 2 | 18 | 0 | 36 |
| *Iris bloudowii* | 18 | 2 | 18 | 1 | 39 |
| *Iris bostrensis* | 16 | 2 | 18 | 0 | 36 |
| *Iris bulleyana* | 17 | 0 | 23 | 0 | 40 |
| *Iris cangshanensis* | 90 | 77 | 31 | 2 | 200 |
| *Iris cedreti* | 15 | 2 | 18 | 0 | 35 |
| *Iris chrysographes* | 17 | 0 | 24 | 0 | 41 |
| *Iris collettii* | 29 | 17 | 25 | 0 | 71 |
| *Iris confusa* | 15 | 0 | 20 | 0 | 35 |
| *Iris cuniculiformis* | 16 | 0 | 17 | 0 | 33 |
| *Iris decora* | 22 | 1 | 30 | 1 | 54 |
| *Iris delavayi* | 17 | 0 | 25 | 0 | 42 |
| *Iris dichotoma* | 18 | 3 | 19 | 0 | 40 |
| *Iris domestica* | 26 | 11 | 24 | 0 | 61 |
| *Iris domestica* (*Belamcanda chinensis*) | 26 | 11 | 24 | 0 | 61 |
| *Iris ensata* | 27 | 2 | 29 | 1 | 59 |
| *Iris flavissima* | 17 | 2 | 20 | 0 | 39 |
| *Iris gatesii* | 16 | 2 | 19 | 0 | 37 |
| *Iris germanica* | 16 | 1 | 18 | 0 | 35 |
| *Iris goniocarpa* | 16 | 0 | 17 | 0 | 33 |
| *Iris goniocarpa var. tenella* | 15 | 0 | 17 | 0 | 32 |
| *Iris halophila* | 26 | 9 | 29 | 11 | 75 |
| *Iris haynei* | 16 | 2 | 18 | 0 | 36 |
| *Iris hermona* | 16 | 2 | 19 | 0 | 37 |
| *Iris hippolyti* | 22 | 3 | 23 | 1 | 49 |
| *Iris iberica* | 17 | 2 | 17 | 0 | 36 |
| *Iris imbricata* | 15 | 1 | 18 | 0 | 34 |
| *Iris japonica* | 15 | 0 | 20 | 0 | 35 |
| *Iris koreana* | 16 | 4 | 22 | 1 | 43 |
| *Iris lactea* | 28 | 10 | 30 | 9 | 77 |
| *Iris lactea var. lactea* | 36 | 29 | 47 | 22 | 134 |
| *Iris laevigata* | 25 | 1 | 33 | 1 | 60 |
| *Iris latistyla* | 18 | 1 | 24 | 0 | 43 |
| *Iris leptophylla* | 17 | 2 | 17 | 0 | 36 |
| **Table S5** Continued | | | | | |
| **Species** | **Four SDR types** | | | |  |
| **Reverse repeat** | **Forward repeat** | **Palindromic repeat** | **Complement repeat** | **Total** |
| *Iris loczyi* | 32 | 0 | 39 | 0 | 71 |
| *Iris lortetii* | 16 | 2 | 18 | 0 | 36 |
| *Iris luojiensis* | 15 | 0 | 20 | 0 | 35 |
| *Iris lutescens* | 18 | 2 | 18 | 0 | 38 |
| *Iris lycotis* | 32 | 0 | 39 | 0 | 71 |
| *Iris mandshurica* | 17 | 2 | 20 | 0 | 39 |
| *Iris mariae* | 17 | 2 | 20 | 0 | 39 |
| *Iris milesii* | 12 | 1 | 18 | 0 | 31 |
| *Iris minutoaurea* | 20 | 12 | 30 | 7 | 69 |
| *Iris missouriensis* | 19 | 4 | 20 | 0 | 43 |
| *Iris nigricans* | 16 | 2 | 18 | 0 | 36 |
| *Iris odaesanensis* | 12 | 0 | 16 | 0 | 28 |
| *Iris orchioides* | 56 | 3 | 61 | 0 | 120 |
| *Iris paradoxa* | 15 | 2 | 20 | 0 | 37 |
| *Iris parvula* | 26 | 0 | 24 | 1 | 51 |
| *Iris petrana* | 16 | 2 | 18 | 8 | 44 |
| *Iris pseudacorus* | 20 | 4 | 28 | 2 | 54 |
| *Iris pseudocapnoides* | 15 | 1 | 17 | 1 | 34 |
| *Iris pumila* | 16 | 2 | 18 | 0 | 36 |
| *Iris reticulata* | 20 | 4 | 27 | 2 | 53 |
| *Iris rossii* | 16 | 4 | 22 | 1 | 43 |
| *Iris rossii var. latifolia* | 21 | 8 | 29 | 0 | 58 |
| *Iris ruthenica* | 16 | 4 | 22 | 1 | 43 |
| *Iris sanguinea* | 18 | 0 | 22 | 0 | 40 |
| *Iris scariosa* | 17 | 0 | 25 | 1 | 43 |
| *Iris setosa* | 21 | 6 | 26 | 5 | 58 |
| *Iris sofarana* | 16 | 2 | 18 | 0 | 36 |
| *Iris speculatrix* | 13 | 0 | 15 | 0 | 28 |
| *Iris sprengeri* | 15 | 0 | 18 | 0 | 33 |
| *Iris tectorum* | 15 | 0 | 23 | 0 | 38 |
| *I.tectorum f. alba* | 15 | 0 | 23 | 0 | 38 |
| *Iris tenuifolia* | 67 | 0 | 66 | 0 | 133 |
| *Iris tigridia* | 15 | 2 | 19 | 0 | 36 |
| *Iris tigridia var. tigridia* | 18 | 2 | 20 | 0 | 40 |
| *Iris typhifolia* | 18 | 0 | 22 | 0 | 40 |
| *Iris uniflora* | 19 | 1 | 25 | 0 | 45 |
| *Iris ventricosa* | 57 | 3 | 54 | 1 | 115 |
| *Iris victoris* | 22 | 2 | 23 | 1 | 48 |
| *Iris wattii* | 15 | 1 | 20 | 1 | 37 |
| *Iris wilsonii* | 17 | 0 | 24 | 0 | 41 |
